# Supplementary material
Source: publisher figshare collection journal article supplement (https://acs.figshare.com/ndownloader/files/13003823)
Supplement: Supplementary file 1 [file 13003823]

## Supporting Information

### **Morphology, Migration and Transcriptome Analysis of Schwann Cell Culture on Butterfly Wings with Different Surface Architectures**

*Jianghong He<sup>1,#</sup>, Cheng Sun<sup>1,#</sup>, Zhongze Gu<sup>2,#</sup>, Yumin Yang<sup>1,#</sup>, Miao Gu<sup>3</sup>, Chengbin Xue<sup>1</sup>,  
Zhuoying Xie<sup>2</sup>, Hechun Ren<sup>1</sup>, Yongjun Wang<sup>1</sup>, Yan Liu<sup>1</sup>, Mei Liu<sup>1</sup>, Fei Ding<sup>1</sup>, Kam W. Leong<sup>4,\*</sup>,  
Xiaosong Gu<sup>1,\*</sup>*

<sup>1</sup>Key Laboratory for Neuroregeneration of Jiangsu Province and Ministry of Education,  
Co-innovation Center of Neuroregeneration, Nantong University, Nantong, 226001, China

<sup>2</sup>State Key Laboratory of Bioelectronics, Southeast University, Nanjing, 210096, China

<sup>3</sup>Chengde Medical College, Chengde, 067000, China

<sup>4</sup>Department of Biomedical Engineering, Columbia University, New York, New York 10027,  
United States

# These authors contribute equally to this work.

\*Corresponding authors: kam.leong@columbia.edu (K.W.Leong); nervegu@ntu.edu.cn (X.  
Gu)

## **Methods**

### **Butterfly wing surface chemical composition analysis**

Butterfly wing surface chemical composition was analyzed by Fourier transform infrared spectrophotometry (FTIR, Thermo Scientific, Nicolet iS10, USA), solid state nuclear magnetic resonance spectroscopy (NMR, Bruker, Avance III 400 MHz, Germany) and X-ray Photoelectron Spectroscopy (XPS, Shimadzu, AXIS-Ultra DLD, Japan).

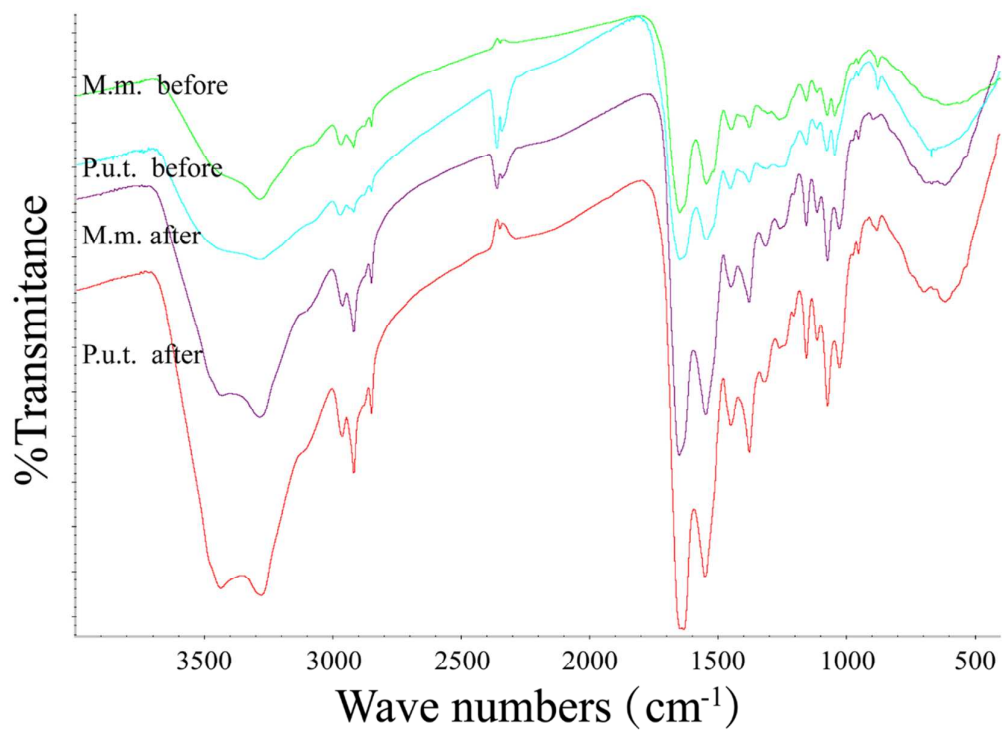

**Figure S1.** The FTIR spectra of M.m. and P.u.t. butterfly wings before or after the acid-base treatment.

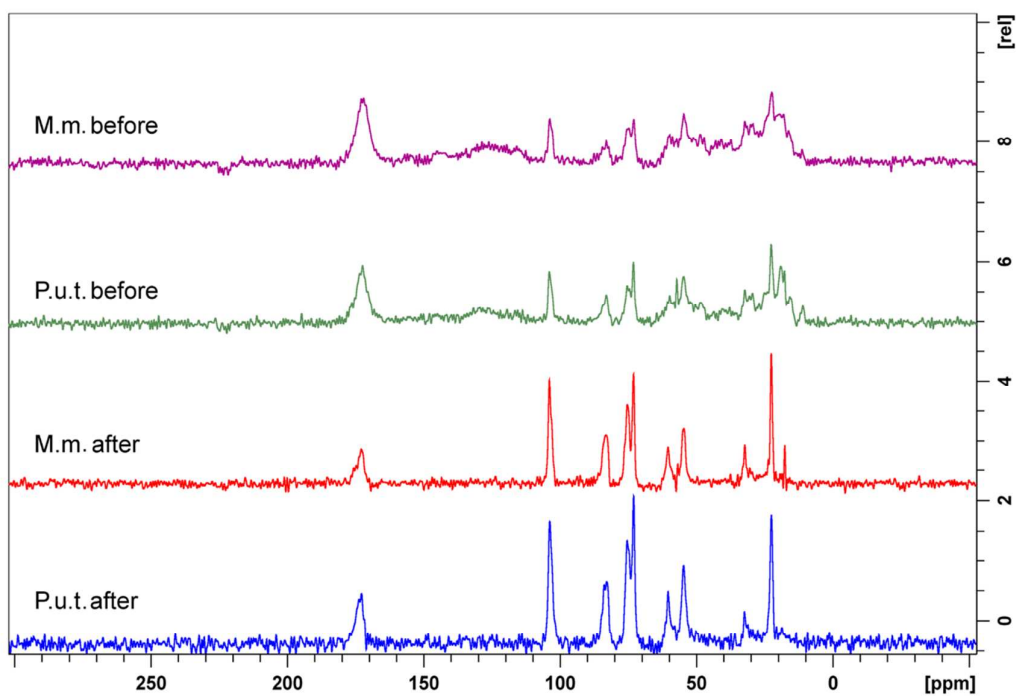

**Figure S2.** The solid state NMR  $^{13}\text{C}$  analysis of M.m. and P.u.t. butterfly wings before or after the acid-base treatment.

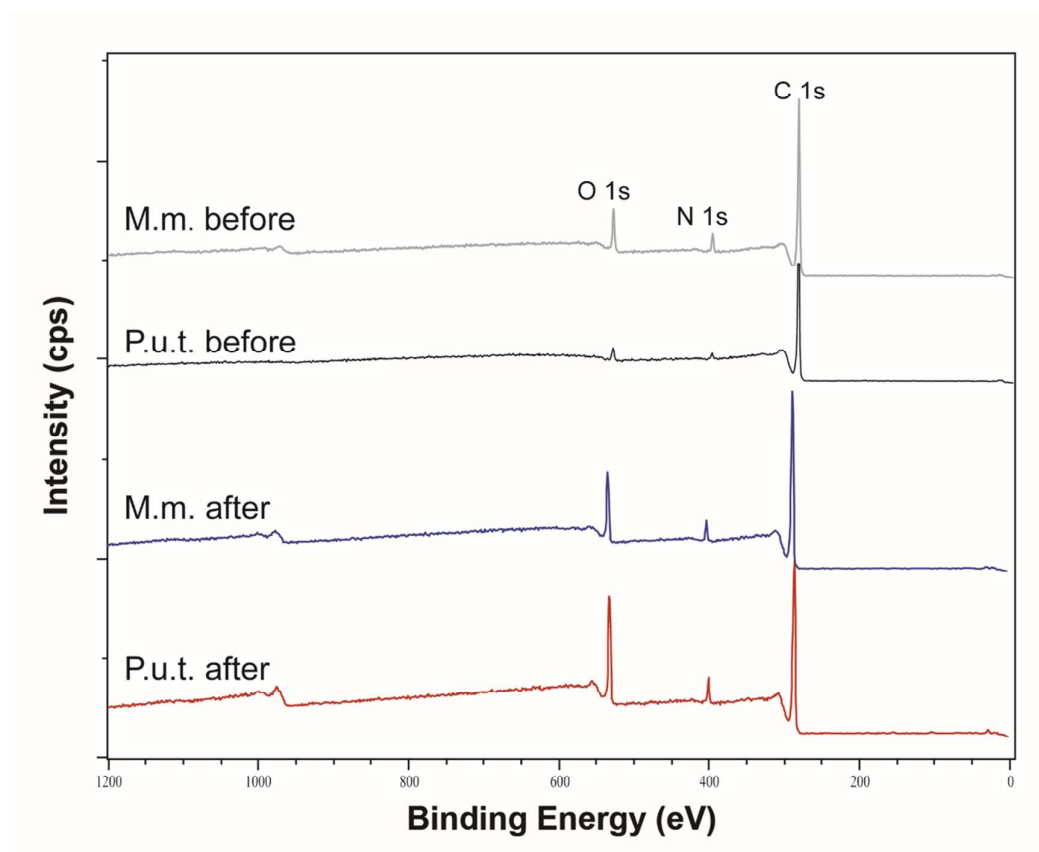

**Figure S3.** The surface element analysis of M.m. and P.u.t. butterfly wings before or after the acid-base treatment.

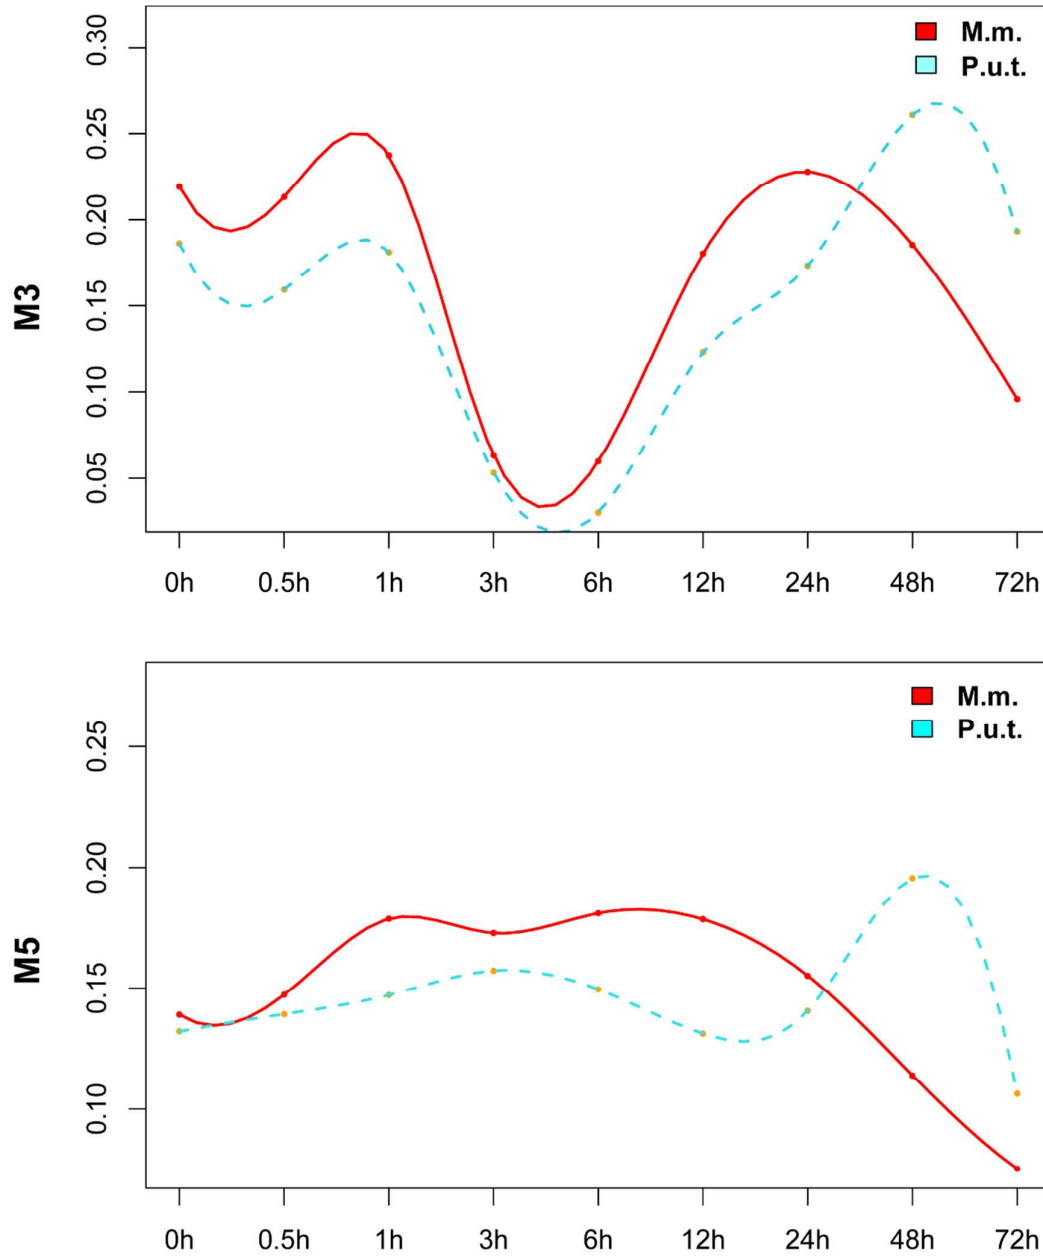

**Figure S4.** Expression trajectory of specific modules. Expression trajectory of module 3 (main function: lysosome, nucleotide binding, transport) and module 5 (main function: cell migration, ion binding) based on ME (module eigengene).

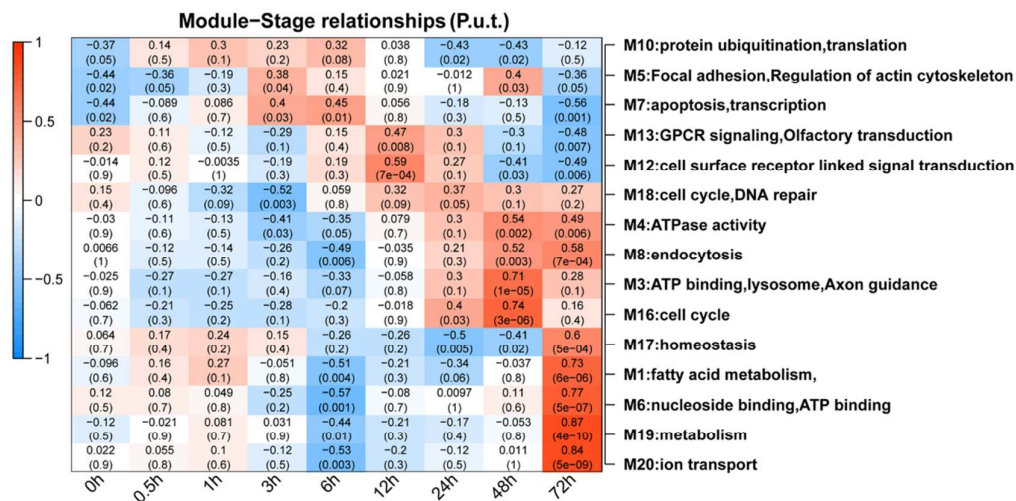

**Figure S5.** Network analysis of cell growth on P.u.t. butterfly wings. Based on the co-expression modules defined by the WGCNA, matrix with the Module-trait relationships association with time variables on the x-axis. The top number in each cell corresponds to correlation and the bottom number is the p-value: red is a strong positive correlation, while blue is a strong negative correlation. Corresponding functional annotation is superimposed on the right frame.

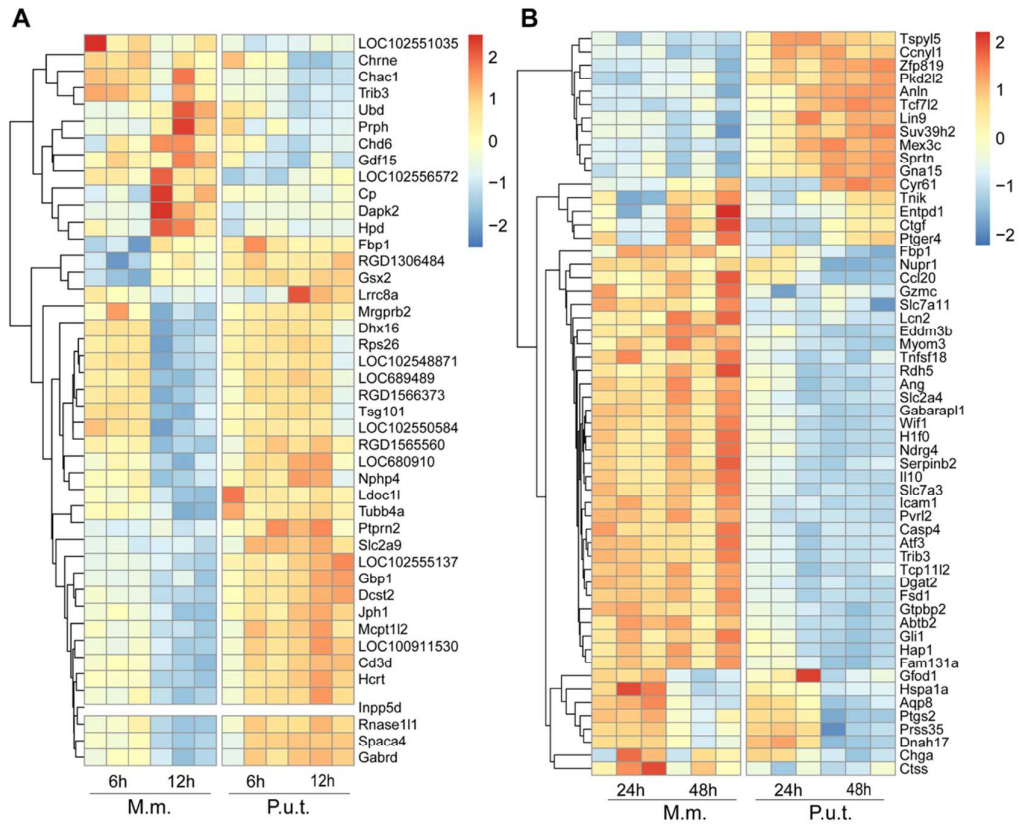

**Figure S6.** Differential expressed gene analysis of stage 2 and stage 3. Heatmap showing relative expression patterns of DEGs at stage 2 (6 h to 12 h) (A) and stage 3 (24 h to 48 h) (B).
